# Supplementary material
Source: publisher figshare collection journal article supplement (https://asha.figshare.com/articles/dataset/_/14417681)
Supplement: Supplementary file 1 [file 1]

| ROI                            | Hemisphere | <i>t</i> -value | <i>p</i> -unc |
|--------------------------------|------------|-----------------|---------------|
| <i>ANS, Rhythm &gt; Normal</i> |            |                 |               |
| SPL                            | Left       | 4.72            | .0003.        |
|                                | Right      | 2.62            | .0203         |
| aSMQ                           | Left       | 4.11            | .0011         |
| mdPMC                          | Right      | 3.98            | .0014         |
|                                | Left       | 2.25            | .0418         |
| PT                             | Left       | 3.82            | .0019         |
|                                | Right      |                 |               |
| SMA                            | Left       | 3.36            | .0046         |
| aINS                           | Left       | 3.29            | .0054 PP      |
|                                | Left       | 3.18            | .0066         |
|                                | Right      | 3.00            | .0096         |
| ITO                            | Left       | 3.06            | .0085         |
|                                | Right      | 2.17            | .0480         |
| preSMA                         | Left       | 2.79            | .0145         |
| pdPMC                          | Left       | 2.78            | .0148         |
| FMC                            | Left       | 2.76            | .0152         |
| vPMC                           | Right      | 2.59            | .0213         |
| PO                             | Left       | 2.53            | .0242         |
| pSMg                           | Right      | 2.43            | .0293         |
|                                | Left       | 2.24            | .0418         |
| aCG                            | Right      | 2.42            | .0296         |
| aSTg                           | Right      | 2.38            | .0319         |
| pSTg                           | Right      | 2.38            | .0321         |
| dMC                            | Left       | 2.33            | .0355         |
| <i>ANS, Normal &gt; Rhythm</i> |            |                 |               |
| pIFt                           | Right      | 2.39            | .0315         |
| <i>AWS, Rhythm &gt; Normal</i> |            |                 |               |
| vIFo                           | Right      | 3.06            | .0092         |
| pSMg                           | Right      | 2.51            | .0260         |
| dIFo                           | Right      | 2.27            | .0411         |
| <i>AWS, Normal &gt; Rhythm</i> |            |                 |               |
| pPHg                           | Right      | 2.68            | .0190         |
| aIFt                           | Right      | 2.30            | .0388         |
| H                              | Right      | 2.20            | .0466         |
| CbmVIIIb                       | Left       | 3.20            | .0070         |
| CbmiX                          | Right      | 2.52            | .0256         |
| GPe                            | Right      | 2.22            | .0449         |

**Supplemental Table S3.** Exploratory regions-of-interest with activation differences between the *rhythm* and *normal* conditions for ANS and AWS ( $p < .05$ ). \* indicates regions that survive a significance threshold of  $p_{FDR} < .05$  for their respective analyses, unc = uncorrected, SPL = superior parietal lobule, aSMg = anterior supramarginal gyrus, mdPMC = middle dorsal premotor cortex, PT = planum temporale, SMA = supplementary motor area, aINS = anterior insula, PP = planum polare, ITO = inferior temporo-occipital cortex, preSMA = presupplementary motor area, pdPMC = posterior dorsal premotor cortex, FMC = fronto-medial cortex, vPMC = ventral premotor cortex, PO = parietal operculum, pSMg = posterior supramarginal gyrus, aCG = anterior cingulate gyrus, aSTg = anterior superior temporal gyrus, pSTg = posterior superior temporal gyrus, dMC = dorsal primary motor cortex, pIFt = posterior inferior frontal gyrus pars triangularis, vIFo = ventral inferior frontal gyrus pars opercularis, dIFo = dorsal inferior frontal gyrus pars opercularis, pPHg = posterior parahippocampal gyrus, aIFt = anterior inferior frontal gyrus pars triangularis, H = Heschl’s gyrus, Cbm = cerebellum, GPe = external portion of the globus pallidus.
