# Supplementary material
Source: publisher figshare collection journal article supplement (https://asha.figshare.com/articles/dataset/_/14417681)
Supplement: Supplementary file 2 [file 1]

| ROI                                  | Hemisphere | <i>t</i> -value | <i>p</i> -unc |
|--------------------------------------|------------|-----------------|---------------|
| <i>Group x Condition Interaction</i> |            |                 |               |
| H                                    | Right      | -2.75           | .0106         |
| PP                                   | Right      | -2.70           | .0118         |
|                                      | Left       | -2.30           | .0297         |
| aIFt                                 | Right      | -2.66           | .0131         |
| FOC                                  | Right      | -2.40           | .0235         |
| PT                                   | Left       | -2.11           | .0445         |
| avSTs                                | Left       | -2.10           | .0448         |
| TP                                   | Left       | -2.10           | .0456         |
| Cbm VIIIb                            | Left       | -3.03           | .005          |
| Cbm VIIla                            | Left       | -2.75           | .0106         |
|                                      | Right      | -2.20           | .0368         |
| Cbm VIIb                             | Left       | -2.52           | .0181         |
| Cbm Crus II                          | Left       | -2.40           | .0237         |
| VPM                                  | Left       | -2.33           | .0276         |
| Cbm Vermis VIIIb                     | Midline    | -2.26           | .0323         |

**Supplemental Table S2.** Exploratory regions-of-interest with significant task activation group x condition interactions ( $p < .05$ ). See Supplemental Figure S2 for individual group and condition effects. unc = uncorrected, H = Heschl's gyms, PP = planum polare, aIFt = anterior inferior frontal gyrus pars triangularis, FOC = fronto-orbital cortex, PT = planum temporale, avSTs = anterior ventral superior temporal sulcus, TP = temporal pole, Cbm = cerebellum, VPM = ventral postero-medial portion of the thalamus.
